# Supplementary material for: Cutaneous melanoma primary site is linked to nevus density
Source: PubMed Central journal article supplement (PMC5716774; doi:10.18632/oncotarget.22016), 2017-10-24
Supplement: oncotarget-08-98876-s001.pdf [file oncotarget-08-98876-s001.pdf]

## Cutaneous melanoma primary site is linked to nevus density

### SUPPLEMENTARY MATERIALS

Supplementary Table 1: Distribution of non-synonymous MC1R variants in melanoma patients (No.=829)

| MC1R variant | Number of patients (%) |        | MAF (%) |
|--------------|------------------------|--------|---------|
| C35Y         | 1                      | (0.1)  | 0.1     |
| L46F         | 1                      | (0.1)  | 0.1     |
| L48P         | 1                      | (0.1)  | 0.1     |
| V59M         | 1                      | (0.1)  | 0.1     |
| V60L         | 285                    | (34.4) | 18.9    |
| A64T         | 1                      | (0.1)  | 0.1     |
| R67W         | 1                      | (0.1)  | 0.1     |
| R67Q         | 1                      | (0.1)  | 0.1     |
| S83P         | 4                      | (1.0)  | 0.4     |
| D84E         | 8                      | (1.0)  | 0.5     |
| V92M         | 92                     | (11.1) | 5.7     |
| T95M         | 2                      | (0.2)  | 0.1     |
| M128T        | 1                      | (0.1)  | 0.1     |
| R142H        | 23                     | (2.8)  | 1.4     |
| R142S        | 1                      | (0.1)  | 0.1     |
| S145F        | 1                      | (0.1)  | 0.1     |
| A149T        | 2                      | (0.2)  | 0.1     |
| R151C        | 74                     | (9.4)  | 5.0     |
| Y152X        | 1                      | (0.5)  | 0.3     |
| I155T        | 29                     | (3.5)  | 1.9     |
| V156L        | 1                      | (0.1)  | 0.1     |
| R160W        | 65                     | (7.8)  | 4.0     |
| R163Q        | 32                     | (3.8)  | 2.0     |
| S172I        | 1                      | (0.1)  | 0.1     |
| R213W        | 2                      | (0.2)  | 0.1     |
| L264I        | 1                      | (0.1)  | 0.1     |
| D294H        | 67                     | (8.1)  | 4.4     |
| C1969DelC    | 2                      | (0.2)  | 0.1     |
